# Supplementary material
Source: Frontiers journal article supplement (https://www.frontiersin.org/articles/289862)
Supplement: Data_Sheet_1.DOCX [file Data_Sheet_1.DOCX]

**Supplementary Materials:**

**Reconstructed Russian fisheries catches in the Barents Sea: 1950-2014**

Sarah Popov1*, Dirk Zeller2

1 *Sea Around Us*, Global Fisheries Cluster, University of British Columbia, 2202 Main Mall, Vancouver, BC, V6T 1Z4, Canada

2 *Sea Around Us –* Indian Ocean, School of Biological Sciences, University of Western Australia, Crawley, WA, 6009, Australia

***Correspondence:**

Sarah Popov, [s.popov@oceans.ubc.ca](mailto:s.popov@oceans.ubc.ca)

1. **Supplementary methods**

**1.1 USSR and Russian Federation adjustments**

As the former Soviet Union only began reporting landings data to ICES in 1955, there are no data for the period 1950-1954 in the ICES database. The Food and Agriculture Organization of the United Nations (FAO) does present data for this five-year period in their database[[1]](#footnote-2). However, the FAO only reports statistics for the entirety of FAO area 27 (i.e., the entire north-east Atlantic region), and only a proportion of the USSR catch reported by FAO for area 27 would actually have been caught in the Barents. In order to approximately separate FAO area 27 catch for 1950-1954 into Barents Sea and non-Barents Sea catch, the total USSR ICES catch of each species was compared to the total catch in FAO area 27 for the latter half of the decade (1955-1960) and the proportion of ICES catch to FAO catch was calculated for each species and ICES area. These proportions were then applied backwards to FAO data for the years 1950-1954 in order to approximate reported landings for the Barents Sea for that time period. The resulting catch data were treated as ‘reported landings’, as the totals were reported in FAO statistics for the 1950-1954 period, even though ICES does not include these data in their dataset.

The landings for the period 1950-1991 are reported as landings of the ‘former Soviet Union’, while the data for 1992 onwards are reported by the individual member states of the former USSR (i.e., Russian Federation, Estonia, Latvia, Lithuania etc.). As no other former USSR republics aside from the Russian Federation border the Barents Sea, all catch reported to ICES from the Barents Sea by the USSR was assumed to represent Russian Federation fleets and was assigned to the fishing country ‘Russia’ for the purposes of this reconstruction.

**1.2 Gap adjustments**

Small adjustments were also made to fill in clearly identifiable gaps in the ICES baseline data as needed. Gaps ranged from one to four years in duration and were compared against literature and other datasets (e.g., ICES Working Groups or FAO data) to determine if there was simply a gap in the data as opposed to fisheries collapse or closure. For example, if catch for a certain taxon for a short time period was reported as “0”, but there existed no evidence of fishery collapse or closure and there existed catch statistics before and after the gap in data, catch tonnages were interpolated across the gap for that taxon. These adjusted catch data were also considered to be a part of ICES ‘reported baseline landings’.

Catch statistics for ‘*Pandalus* nei’ (nei = ‘not elsewhere included’) from the years 1974-1978 were relabeled as northern shrimp (*Pandalus borealis*), as a 2001 ICES working group report (ICES, 2001) indicated that trawling for northern shrimp began in the same year that ‘*Pandalus* nei’ catch was first reported. Blank years (1975-1977) between ‘*Pandalus* nei’ and ‘northern shrimp’ (*Pandalus borealis*) catch data were linearly interpolated, as there was no evidence that shrimp trawlers were not operating in those years (ICES, 2001). Note that ICES refers to this species as ‘northern prawn’ in its stock assessments.

In order for the present reconstruction to be structurally consistent with the global *Sea Around Us* database, only marine fisheries catches were considered. Thus, reported Atlantic salmon (*Salmo salar*) landings were halved to account for fish caught in rivers as opposed to at sea/estuaries, as according to the ICES Working Group on North Atlantic Salmon (WGNAS), “in most countries the majority of the catch is now taken in rivers and estuaries, except in … Russia where roughly half of the total catch is still taken in coastal waters” (ICES, 2015b).

**1.3 Discard rates**

As Kelleher (2005) covered several years and provided numerous estimates across those years, we applied the lower Kelleher discard rates whenever new gear regulations were identified as being introduced to Barents Sea fisheries. For example, with the introduction of sorting grids in the northern shrimp fishery in 1993, the lower “North Sea shrimp trawl” discard rate of 5.4% (Kelleher, 2005) was used in calculating discards after 1993.

Sorting grid regulations were introduced for three fisheries during the study period: the northern shrimp trawl (1993), groundfish trawl (1997), and Greenland halibut flatfish trawl (2013; Dingsør, 2001; ICES, 2015a); the lower Kelleher (2005) discard rate estimates were introduced in each of those fisheries during those years, respectively. For “transition years” between Alverson et al. (1994) and Kelleher (2005) discard rate estimates, discard rates were linearly interpolated between those years (see Table 4 in the main text for a summary of discard rates and Table S1 for a detailed discards calculation timeline).

In the case of the Greenland halibut bottom trawl fishery, sorting grids were introduced into the fishery in 2013 (ICES, 2015a). To account for this, Kelleher’s (2005) bottom flatfish trawl discard rate was halved for the final two years of the reconstruction.

In the case of the two pelagic gears, the Kelleher (2005) rates were used immediately after 1989, as no sorting grids were being introduced into the fishery but larger mesh sizes were being incorporated throughout various Barents Sea fisheries in the 1990s (Matishov et al., 2004; Gullestad et al., 2014).

**1.4 Discard composition**

Discard compositions were adapted from joint IMR/PINRO trawling and longlining surveys (McBride et al., 2014). For simplicity’s sake, any species that accounted for ≤1% of the total catch weight reported by these surveys were eliminated from our discard calculations. We recognize that this will exclude consideration of species that have naturally low densities, so-called rare species, which may be more susceptible to conservation concerns. Russian species composition is presented as a table that “includes non-commercial species caught in bottom and pelagic trawls” (McBride et al., 2014). In order to separate out bottom trawl species from pelagic trawl species, Fishbase[[2]](#footnote-3) was used to delineate demersal species from pelagic species. Norwegian longline species compositions were used for the longline discard species composition as there were no data on Russian longline species composition (McBride et al., 2014). In short, three “baseline” species compositions were adapted from IMR/PINRO data: pelagic trawl species, bottom trawl species, and longline species. These baseline compositions were then modified by decade to better match discard estimates of individual species by decade and to reflect the inclusion of sorting grids in certain fisheries (see Table S1).

Because no bycatch regulations were found for the Russian longlining fishery, the relatively modern estimates of longline species composition were used for the entire study period (1950-2014). Similarly, no evidence was found of sorting grids in the pelagic trawl fisheries, and no known sorting technology is currently employed by the purse seining fleet; as such, the same pelagic trawl discard taxa composition was used for both pelagic trawls and purse seiners for the entire study period.

Species composition for the bottom trawl discards, however, varied over time to take into account the introduction of sorting grids in the northern shrimp, groundfish, and Greenland halibut fisheries. Notably, “during [IMR/PINRO] exploratory fishery operations, it was mandatory to use sorting grids”, suggesting that the IMR/PINRO catch compositions do not accurately reflect historical catch compositions before sorting grids were introduced in each fishery. To account for this, the relative amount of redfish (*Sebastes* spp*.*) and underage cod (*Gadus morhua*) within the discards was adjusted every decade to match independently estimated decadal discard rates of these two commonly discarded and well-studied species (Nakken, 1998; Dingsør, 2001; McBride et al., 2014).

**1.5 Subsistence fishing: per-capita estimates and population estimates**

Detailed Russian census data for the years 1989, 2002, and 2010 provided population breakdowns by sector (rural, urban) and by administrative division (*oblast*). These years were used to estimate the population of the Barents Sea region by adding up the rural populations of the three *oblasts* bordering the Barents Sea: *Murmansk oblast*, *Arkhangelsk oblast* and *Nenets oblast*. The ratios of each *oblast’s* population to the rest of Russia in these three years were used as anchor points to estimate each *oblast’s* population during years for which there was no census. Between 1989, 2002, and 2010 the ratios were linearly interpolated between anchor points; for all years before 1989, the 1989 ratio was applied; for all years after 2010, the 2010 ratio was used. In addition, the ratio of urban to rural residents was interpolated between census years in the same manner. It should be noted that due to the steady migration to urban centers across the globe since 1950, the 1950-1989 estimate of rural to urban populations is likely an underestimate (Fig. S1).


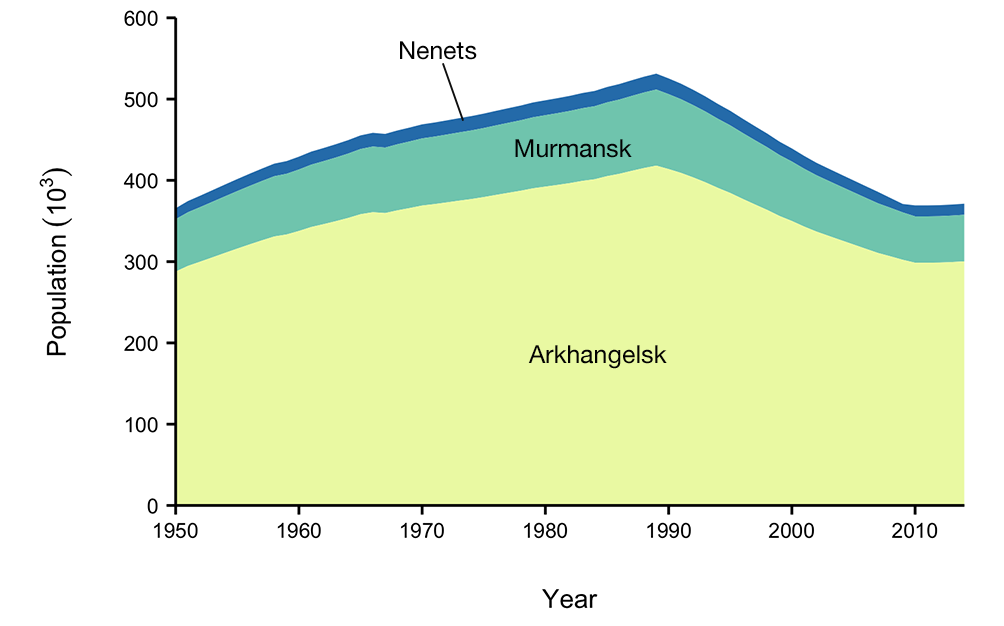


**Supplementary Figure S1**. Rural human population in the Barents Sea region by *oblast*.

Per-capita fish consumption rates varied over the years, with the per-capita rate of fish consumption during the years of the Soviet Union being 23.5 kg per person (FAO, 2007). Fish consumption decreased with the decline and dismantling of the Soviet Union, dropping to 15 kg per person in 1987 and 10 kg per person in 2002 (Matishov et al., 2004). Recent statistics from the Organisation for Economic Co-operation and Development (OECD) suggest that with the rise of the Russian middle class in the last decade, consumption of fish products rose to 21.2 kg per person by the year 2010 (OECD, 2015). While these statistics are representative of Russia’s population as a whole, we feel they are reasonable estimates to be applied to one region. For years between estimates, per capita consumption rates were linearly interpolated.

1. **Supplementary results**


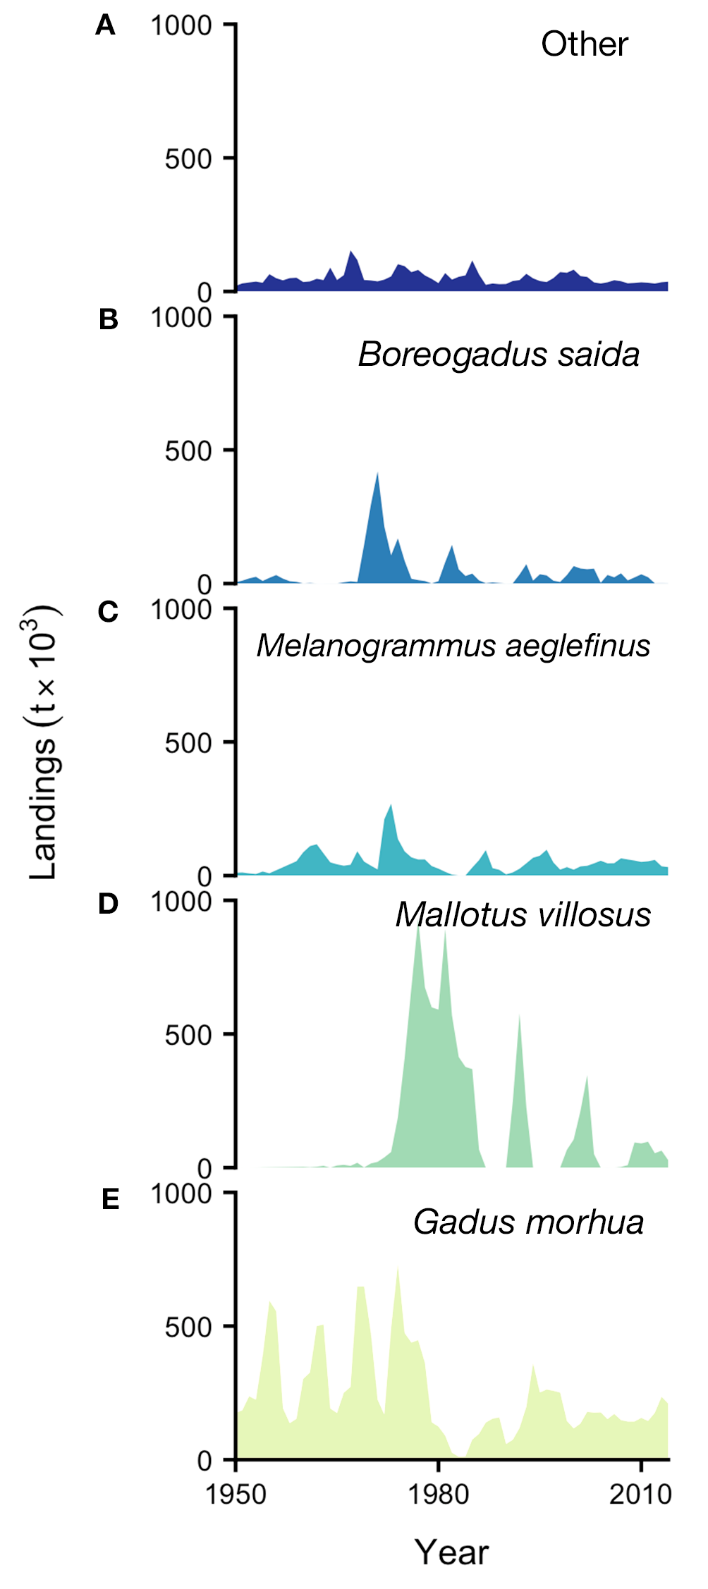


**Supplementary Figure S2**. Total landings split into the four most common taxa plus ‘other’. In all cases, catch peaked pre-1980. (**A**) The ‘Other’ category comprises 59 other taxonomic groups; (**B**) polar cod (*Boreogadus saida*); (**C**) haddock (*Melanogrammus aeglefinus*); (**D**) capelin (*Mallotus villosus*); and (**E**) cod (*Gadus morhua*).


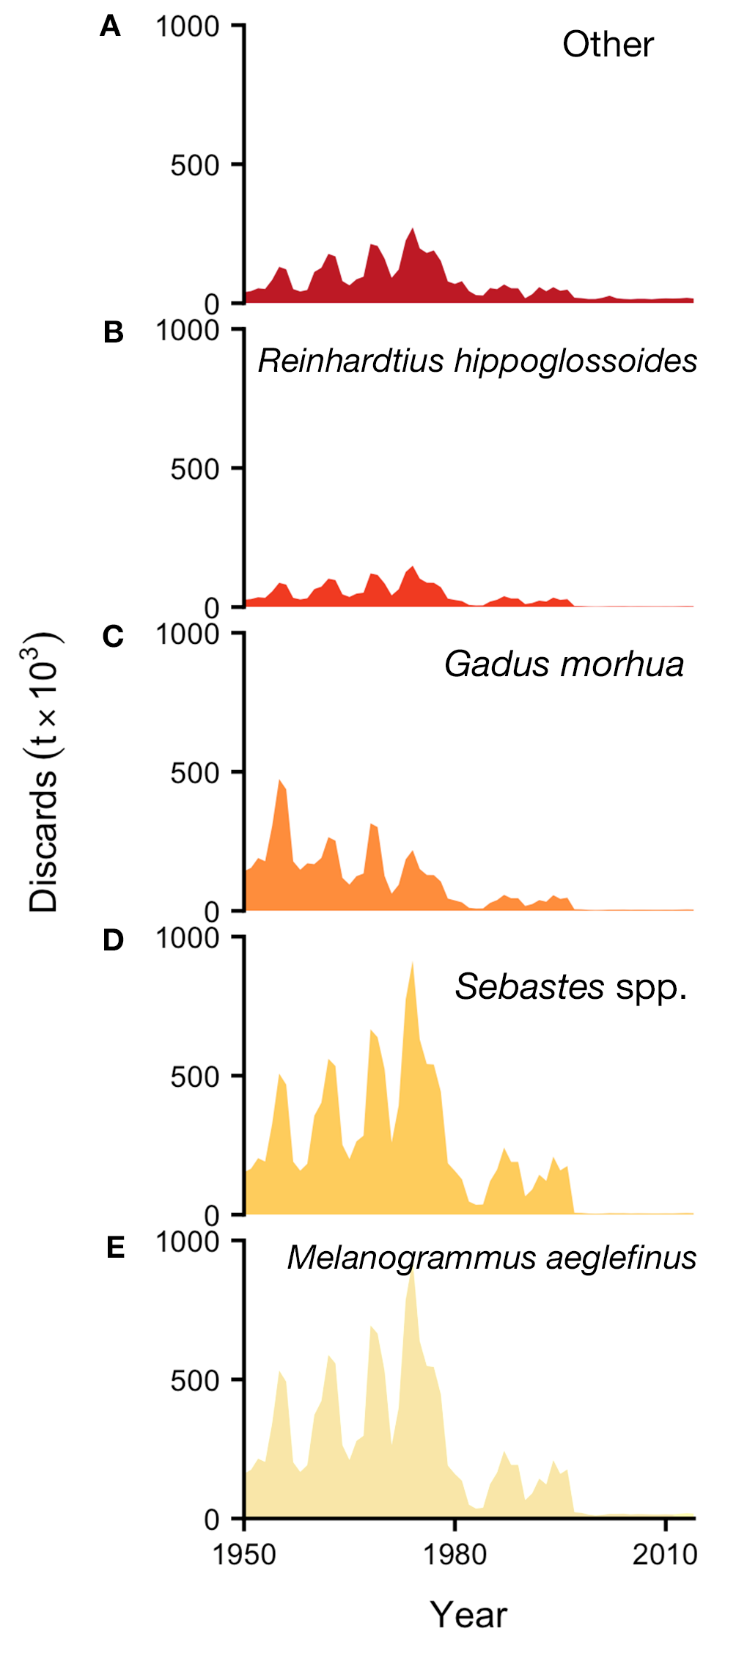


**Supplementary Figure S3**. Total discards separated into the four most common taxa plus ‘other’. In all cases, discards peaked pre-1980 and substantially declined with the introduction of discard mitigation measures. (**A**) The ‘Other’ category comprises 19 other taxonomic groups. Discards of (**B**) Greenland halibut (*Reinhardtius hippoglossoides*); (**C**) cod (*Gadus morhua*); (**D**) redfishes (*Sebastes* spp.); and (**E**) haddock (*Melanogrammus aeglefinus*).

# Bibliography

Alverson, D.L., Freeberg, M.H., Murawski, S.A., and Pope, J.G. (1994). "A global assessment of fisheries bycatch and discards" in: *FAO Fisheries Technical Paper.* (Rome: FAO).

Dingsør, G. (2001). "Norwegian un-mandated catches and effort" in: *Fisheries Impacts on North Atlantic Ecosystems: Catch, Effort and National/Regional Data Sets.* (Vancouver, Canada: University of British Columbia).

FAO (2007). "National Fishery Sector Overview: The Russian Federation" in: *Fishery and Aquaculture Country Profiles.* (Rome: FAO).

Gullestad, P., Blom, G., Bakke, G., and Bogstad, B. (2014). The "Discard Ban Package": Experiences in efforts to improve the exploitation patterns in Norwegian fisheries. *Marine Policy* 54**,** 1-9. doi: <http://dx.doi.org/10.1016/j.marpol.2014.09.025>.

ICES (2001). "Report of the ICES Advisory Committee on Fishery Management, 2001" in: *ICES Cooperative Research Report.* (Copenhagen).

ICES (2015a). "Report of the Arctic Fisheries Working Group (AFWG)". (Hamburg, Germany: ICES).

ICES (2015b). "Report of the Working Group on North Atlantic Salmon (WGNAS)". (Moncton, Canada).

Kelleher, K. (2005). "Discards in the World's Marine Fisheries. An Update." in: *FAO Fisheries Technical Paper.* (Rome: FAO).

Matishov, G.G., Denisov, V.V., Dzhenyuk, S.L., Karamushko, O.V., and Daler, D. (2004). The Impact of Fisheries on the Dynamics of Commercial Fish Species in Barents Sea and the Sea of Azov, Russia: A Historical Perspective. *AMBIO: A Journal of the Human Environment* 33**,** 63-67. doi: <http://dx.doi.org/10.1579/0044-7447-33.1.63>.

McBride, M.M., Filin, A., Titov, O., and Stiansen, J.E. (2014). "IMR/PINRO update of the "Joint Norwegian-Russian environmental status report on the Barents Sea Ecosystem" giving the current situation for climate, phytoplankton, zooplankton, fish, and fisheries during 2012-13." in: *IMR/PINRO Joint Report Series.* IMR/PINRO).

Nakken, O. (1998). Past, present and future exploitation and management of marine resources in the Barents Sea and adjacent areas. *Fisheries Research* 37**,** 23-35.

OECD (2015). "OECD Review of Fisheries: Policies and Summary Statistics 2015" in: *OECD Review of Fisheries: Policies and Summary Statistics.* (Paris, France: OECD).

1. <http://www.fao.org/fishery/statistics/en> [↑](#footnote-ref-2)
2. <http://fishbase.ca/> [↑](#footnote-ref-3)
