# Supplementary material
Source: Frontiers journal article supplement (https://www.frontiersin.org/articles/289862)
Supplement: Table_1.xlsx [file Table_1.xlsx]

## Sheet: gear timeline
	1950s					1960s					1970s					1980s					1990-1992					1993-1996: Prawn sorting grids					1997-2012: Groundfish sorting grids					2013: Greenland halibut sorting grids
Fishery	Geartype	% Catch by geartype	Discard rate	Discard species	% discard W species	Geartype	% Catch by geartype	Discard rate	Discard species	% discard W species	Geartype	% Catch by geartype	Discard rate	Discard species	% discard W species	Geartype	% Catch by geartype	Discard rate	Discard species	% discard W species	Geartype	% Catch by geartype	Discard rate	Discard species	% discard W species	Geartype	% Catch by geartype	Discard rate	Discard species	% discard W species	Geartype	% Catch by geartype	Discard rate	Discard species	% discard W species	Geartype	% Catch by geartype	Discard rate	Discard species	% discard W species
Capelin	Pelagic trawl	0.84	0.002	Herring	0.45	Pelagic trawl	0.84	0.002	Herring	0.45	Pelagic trawl	0.84	0.002	Herring	0.45	Pelagic trawl	0.84	0.002	Herring	0.45	Pelagic trawl	0.84	0.035	Herring	0.45	Pelagic trawl	0.84	0.035	Herring	0.45	Pelagic trawl	0.84	0.035	Herring	0.45	Pelagic trawl	0.84	0.035	Herring	0.45
				Capelin	0.2				Capelin	0.2				Capelin	0.2				Capelin	0.2				Capelin	0.2				Capelin	0.2				Capelin	0.2				Capelin	0.2
				Polar cod	0.2				Polar cod	0.2				Polar cod	0.2				Polar cod	0.2				Polar cod	0.2				Polar cod	0.2				Polar cod	0.2				Polar cod	0.2
				Belone belone	0.025				Belone belone	0.025				Belone belone	0.025				Belone belone	0.025				Belone belone	0.025				Belone belone	0.025				Belone belone	0.025				Belone belone	0.025
				Scomber scombrus	0.025				Scomber scombrus	0.025				Scomber scombrus	0.025				Scomber scombrus	0.025				Scomber scombrus	0.025				Scomber scombrus	0.025				Scomber scombrus	0.025				Scomber scombrus	0.025
				Ammodytidae	0.025				Ammodytidae	0.025				Ammodytidae	0.025				Ammodytidae	0.025				Ammodytidae	0.025				Ammodytidae	0.025				Ammodytidae	0.025				Ammodytidae	0.025
				Coregonus	0.025				Coregonus	0.025				Coregonus	0.025				Coregonus	0.025				Coregonus	0.025				Coregonus	0.025				Coregonus	0.025				Coregonus	0.025
				Cyclopterus lumpus	0.025				Cyclopterus lumpus	0.025				Cyclopterus lumpus	0.025				Cyclopterus lumpus	0.025				Cyclopterus lumpus	0.025				Cyclopterus lumpus	0.025				Cyclopterus lumpus	0.025				Cyclopterus lumpus	0.025
				Sebastes spp.	0.025				Sebastes spp.	0.025				Sebastes spp.	0.025				Sebastes spp.	0.025				Sebastes spp.	0.025				Sebastes spp.	0.025				Sebastes spp.	0.025				Sebastes spp.	0.025
	Purse seine	0.16	0.248	Herring	0.45	Purse seine	0.16	0.248	Herring	0.45	Purse seine	0.16	0.248	Herring	0.45	Purse seine	0.16	0.248	Herring	0.45	Purse seine	0.16	0.012	Herring	0.45	Purse seine	0.16	0.012	Herring	0.45	Purse seine	0.16	0.012	Herring	0.45	Purse seine	0.16	0.012	Herring	0.45
				Capelin	0.2				Capelin	0.2				Capelin	0.2				Capelin	0.2				Capelin	0.2				Capelin	0.2				Capelin	0.2				Capelin	0.2
				Polar cod	0.2				Polar cod	0.2				Polar cod	0.2				Polar cod	0.2				Polar cod	0.2				Polar cod	0.2				Polar cod	0.2				Polar cod	0.2
				Belone belone	0.025				Belone belone	0.025				Belone belone	0.025				Belone belone	0.025				Belone belone	0.025				Belone belone	0.025				Belone belone	0.025				Belone belone	0.025
				Scomber scombrus	0.025				Scomber scombrus	0.025				Scomber scombrus	0.025				Scomber scombrus	0.025				Scomber scombrus	0.025				Scomber scombrus	0.025				Scomber scombrus	0.025				Scomber scombrus	0.025
				Ammodytidae	0.025				Ammodytidae	0.025				Ammodytidae	0.025				Ammodytidae	0.025				Ammodytidae	0.025				Ammodytidae	0.025				Ammodytidae	0.025				Ammodytidae	0.025
				Coregonus	0.025				Coregonus	0.025				Coregonus	0.025				Coregonus	0.025				Coregonus	0.025				Coregonus	0.025				Coregonus	0.025				Coregonus	0.025
				Cyclopterus lumpus	0.025				Cyclopterus lumpus	0.025				Cyclopterus lumpus	0.025				Cyclopterus lumpus	0.025				Cyclopterus lumpus	0.025				Cyclopterus lumpus	0.025				Cyclopterus lumpus	0.025				Cyclopterus lumpus	0.025
				Sebastes spp.	0.025				Sebastes spp.	0.025				Sebastes spp.	0.025				Sebastes spp.	0.025				Sebastes spp.	0.025				Sebastes spp.	0.025				Sebastes spp.	0.025				Sebastes spp.	0.025
Herring	Pelagic trawl	0.84	0.002	Herring	0.45	Pelagic trawl	0.84	0.002	Herring	0.45	Pelagic trawl	0.84	0.002	Herring	0.45	Pelagic trawl	0.84	0.002	Herring	0.45	Pelagic trawl	0.84	0.035	Herring	0.45	Pelagic trawl	0.84	0.035	Herring	0.45	Pelagic trawl	0.84	0.035	Herring	0.45	Pelagic trawl	0.84	0.035	Herring	0.45
				Capelin	0.2				Capelin	0.2				Capelin	0.2				Capelin	0.2				Capelin	0.2				Capelin	0.2				Capelin	0.2				Capelin	0.2
				Polar cod	0.2				Polar cod	0.2				Polar cod	0.2				Polar cod	0.2				Polar cod	0.2				Polar cod	0.2				Polar cod	0.2				Polar cod	0.2
				Belone belone	0.025				Belone belone	0.025				Belone belone	0.025				Belone belone	0.025				Belone belone	0.025				Belone belone	0.025				Belone belone	0.025				Belone belone	0.025
				Scomber scombrus	0.025				Scomber scombrus	0.025				Scomber scombrus	0.025				Scomber scombrus	0.025				Scomber scombrus	0.025				Scomber scombrus	0.025				Scomber scombrus	0.025				Scomber scombrus	0.025
				Ammodytidae	0.025				Ammodytidae	0.025				Ammodytidae	0.025				Ammodytidae	0.025				Ammodytidae	0.025				Ammodytidae	0.025				Ammodytidae	0.025				Ammodytidae	0.025
				Coregonus	0.025				Coregonus	0.025				Coregonus	0.025				Coregonus	0.025				Coregonus	0.025				Coregonus	0.025				Coregonus	0.025				Coregonus	0.025
				Cyclopterus lumpus	0.025				Cyclopterus lumpus	0.025				Cyclopterus lumpus	0.025				Cyclopterus lumpus	0.025				Cyclopterus lumpus	0.025				Cyclopterus lumpus	0.025				Cyclopterus lumpus	0.025				Cyclopterus lumpus	0.025
				Sebastes spp.	0.025				Sebastes spp.	0.025				Sebastes spp.	0.025				Sebastes spp.	0.025				Sebastes spp.	0.025				Sebastes spp.	0.025				Sebastes spp.	0.025				Sebastes spp.	0.025
	Purse seine	0.16	0.248	Herring	0.45	Purse seine	0.16	0.248	Herring	0.45	Purse seine	0.16	0.248	Herring	0.45	Purse seine	0.16	0.248	Herring	0.45	Purse seine	0.16	0.012	Herring	0.45	Purse seine	0.16	0.012	Herring	0.45	Purse seine	0.16	0.012	Herring	0.45	Purse seine	0.16	0.012	Herring	0.45
				Capelin	0.2				Capelin	0.2				Capelin	0.2				Capelin	0.2				Capelin	0.2				Capelin	0.2				Capelin	0.2				Capelin	0.2
				Polar cod	0.2				Polar cod	0.2				Polar cod	0.2				Polar cod	0.2				Polar cod	0.2				Polar cod	0.2				Polar cod	0.2				Polar cod	0.2
				Belone belone	0.025				Belone belone	0.025				Belone belone	0.025				Belone belone	0.025				Belone belone	0.025				Belone belone	0.025				Belone belone	0.025				Belone belone	0.025
				Scomber scombrus	0.025				Scomber scombrus	0.025				Scomber scombrus	0.025				Scomber scombrus	0.025				Scomber scombrus	0.025				Scomber scombrus	0.025				Scomber scombrus	0.025				Scomber scombrus	0.025
				Ammodytidae	0.025				Ammodytidae	0.025				Ammodytidae	0.025				Ammodytidae	0.025				Ammodytidae	0.025				Ammodytidae	0.025				Ammodytidae	0.025				Ammodytidae	0.025
				Coregonus	0.025				Coregonus	0.025				Coregonus	0.025				Coregonus	0.025				Coregonus	0.025				Coregonus	0.025				Coregonus	0.025				Coregonus	0.025
				Cyclopterus lumpus	0.025				Cyclopterus lumpus	0.025				Cyclopterus lumpus	0.025				Cyclopterus lumpus	0.025				Cyclopterus lumpus	0.025				Cyclopterus lumpus	0.025				Cyclopterus lumpus	0.025				Cyclopterus lumpus	0.025
				Sebastes spp.	0.025				Sebastes spp.	0.025				Sebastes spp.	0.025				Sebastes spp.	0.025				Sebastes spp.	0.025				Sebastes spp.	0.025				Sebastes spp.	0.025				Sebastes spp.	0.025
Polar cod	Pelagic trawl	0.84	0.002	Herring	0.45	Pelagic trawl	0.84	0.002	Herring	0.45	Pelagic trawl	0.84	0.002	Herring	0.45	Pelagic trawl	0.84	0.002	Herring	0.45	Pelagic trawl	0.84	0.035	Herring	0.45	Pelagic trawl	0.84	0.035	Herring	0.45	Pelagic trawl	0.84	0.035	Herring	0.45	Pelagic trawl	0.84	0.035	Herring	0.45
				Capelin	0.2				Capelin	0.2				Capelin	0.2				Capelin	0.2				Capelin	0.2				Capelin	0.2				Capelin	0.2				Capelin	0.2
				Polar cod	0.2				Polar cod	0.2				Polar cod	0.2				Polar cod	0.2				Polar cod	0.2				Polar cod	0.2				Polar cod	0.2				Polar cod	0.2
				Belone belone	0.025				Belone belone	0.025				Belone belone	0.025				Belone belone	0.025				Belone belone	0.025				Belone belone	0.025				Belone belone	0.025				Belone belone	0.025
				Scomber scombrus	0.025				Scomber scombrus	0.025				Scomber scombrus	0.025				Scomber scombrus	0.025				Scomber scombrus	0.025				Scomber scombrus	0.025				Scomber scombrus	0.025				Scomber scombrus	0.025
				Ammodytidae	0.025				Ammodytidae	0.025				Ammodytidae	0.025				Ammodytidae	0.025				Ammodytidae	0.025				Ammodytidae	0.025				Ammodytidae	0.025				Ammodytidae	0.025
				Coregonus	0.025				Coregonus	0.025				Coregonus	0.025				Coregonus	0.025				Coregonus	0.025				Coregonus	0.025				Coregonus	0.025				Coregonus	0.025
				Cyclopterus lumpus	0.025				Cyclopterus lumpus	0.025				Cyclopterus lumpus	0.025				Cyclopterus lumpus	0.025				Cyclopterus lumpus	0.025				Cyclopterus lumpus	0.025				Cyclopterus lumpus	0.025				Cyclopterus lumpus	0.025
				Sebastes spp.	0.025				Sebastes spp.	0.025				Sebastes spp.	0.025				Sebastes spp.	0.025				Sebastes spp.	0.025				Sebastes spp.	0.025				Sebastes spp.	0.025				Sebastes spp.	0.025
	Purse seine	0.16	0.248	Herring	0.45	Purse seine	0.16	0.248	Herring	0.45	Purse seine	0.16	0.248	Herring	0.45	Purse seine	0.16	0.248	Herring	0.45	Purse seine	0.16	0.012	Herring	0.45	Purse seine	0.16	0.012	Herring	0.45	Purse seine	0.16	0.012	Herring	0.45	Purse seine	0.16	0.012	Herring	0.45
				Capelin	0.2				Capelin	0.2				Capelin	0.2				Capelin	0.2				Capelin	0.2				Capelin	0.2				Capelin	0.2				Capelin	0.2
				Polar cod	0.2				Polar cod	0.2				Polar cod	0.2				Polar cod	0.2				Polar cod	0.2				Polar cod	0.2				Polar cod	0.2				Polar cod	0.2
				Belone belone	0.025				Belone belone	0.025				Belone belone	0.025				Belone belone	0.025				Belone belone	0.025				Belone belone	0.025				Belone belone	0.025				Belone belone	0.025
				Scomber scombrus	0.025				Scomber scombrus	0.025				Scomber scombrus	0.025				Scomber scombrus	0.025				Scomber scombrus	0.025				Scomber scombrus	0.025				Scomber scombrus	0.025				Scomber scombrus	0.025
				Ammodytidae	0.025				Ammodytidae	0.025				Ammodytidae	0.025				Ammodytidae	0.025				Ammodytidae	0.025				Ammodytidae	0.025				Ammodytidae	0.025				Ammodytidae	0.025
				Coregonus	0.025				Coregonus	0.025				Coregonus	0.025				Coregonus	0.025				Coregonus	0.025				Coregonus	0.025				Coregonus	0.025				Coregonus	0.025
				Cyclopterus lumpus	0.025				Cyclopterus lumpus	0.025				Cyclopterus lumpus	0.025				Cyclopterus lumpus	0.025				Cyclopterus lumpus	0.025				Cyclopterus lumpus	0.025				Cyclopterus lumpus	0.025				Cyclopterus lumpus	0.025
				Sebastes spp.	0.025				Sebastes spp.	0.025				Sebastes spp.	0.025				Sebastes spp.	0.025				Sebastes spp.	0.025				Sebastes spp.	0.025				Sebastes spp.	0.025				Sebastes spp.	0.025
Cod	Bottom trawl (finfish)	0.93	2.838	Cod	0.28	Bottom trawl (finfish)	0.93	2.838	Cod	0.16	Bottom trawl (finfish)	0.93	2.838	Cod	0.09	Bottom trawl (finfish)	0.93	2.838	Cod	0.09	Bottom trawl (finfish)	0.93	2.838	Cod	0.1	Bottom trawl (finfish)	0.93	interpolated	Cod	0.1	Bottom trawl (finfish)	0.93	0.196	Cod	0.1	Bottom trawl (finfish)	0.93	0.196	Cod	0.1
				Redfish	0.3				Redfish	0.34				Redfish	0.38				Redfish	0.38				Redfish	0.37				Redfish	0.37				Redfish	0.1221				Redfish	0.1221
				Haddock	0.3				Haddock	0.34				Haddock	0.37				Haddock	0.37				Haddock	0.37				Haddock	0.37				Haddock	0.37				Haddock	0.37
				Greenland halibut	0.05				Greenland halibut	0.06				Greenland halibut	0.06				Greenland halibut	0.06				Greenland halibut	0.06				Greenland halibut	0.06				Greenland halibut	0.07				Greenland halibut	0.07
				Wolffishes	0.02				Wolffishes	0.03				Wolffishes	0.03				Wolffishes	0.03				Wolffishes	0.03				Wolffishes	0.03				Wolffishes	0.07				Wolffishes	0.07
				Pleuronectidae	0.03				Pleuronectidae	0.04				Pleuronectidae	0.04				Pleuronectidae	0.04				Pleuronectidae	0.04				Pleuronectidae	0.04				Pleuronectidae	0.1				Pleuronectidae	0.1
				Saithe	0.02				Saithe	0.03				Saithe	0.03				Saithe	0.03				Saithe	0.03				Saithe	0.03				Saithe	0.07				Saithe	0.07
				-	-				-	-				-	-				-	-				-	-				-	-				Gadiformes	0.1				Gadiformes	0.1
	Longline	0.07	0.784	Haddock	0.6	Longline	0.07	0.784	Haddock	0.6	Longline	0.07	0.784	Haddock	0.6	Longline	0.07	0.784	Haddock	0.6	Longline	0.07	0.075	Haddock	0.6	Longline	0.07	0.075	Haddock	0.6	Longline	0.07	0.075	Haddock	0.6	Longline	0.07	0.075	Haddock	0.6
				Wolffishes	0.18				Wolffishes	0.18				Wolffishes	0.18				Wolffishes	0.18				Wolffishes	0.18				Wolffishes	0.18				Wolffishes	0.18				Wolffishes	0.18
				Cod	0.04				Cod	0.04				Cod	0.04				Cod	0.04				Cod	0.04				Cod	0.04				Cod	0.04				Cod	0.04
				Greenland halibut	0.07				Greenland halibut	0.07				Greenland halibut	0.07				Greenland halibut	0.07				Greenland halibut	0.07				Greenland halibut	0.07				Greenland halibut	0.07				Greenland halibut	0.07
				Redfish	0.03				Redfish	0.03				Redfish	0.03				Redfish	0.03				Redfish	0.03				Redfish	0.03				Redfish	0.03				Redfish	0.03
				Gadiformes	0.05				Gadiformes	0.05				Gadiformes	0.05				Gadiformes	0.05				Gadiformes	0.05				Gadiformes	0.05				Gadiformes	0.05				Gadiformes	0.05
				Pleuronectidae	0.01				Pleuronectidae	0.01				Pleuronectidae	0.01				Pleuronectidae	0.01				Pleuronectidae	0.01				Pleuronectidae	0.01				Pleuronectidae	0.01				Pleuronectidae	0.01
				Raja	0.02				Raja	0.02				Raja	0.02				Raja	0.02				Raja	0.02				Raja	0.02				Raja	0.02				Raja	0.02
Haddock	Bottom trawl (finfish)	0.93	2.838	Cod	0.28	Bottom trawl (finfish)	0.93	2.838	Cod	0.16	Bottom trawl (finfish)	0.93	2.838	Cod	0.09	Bottom trawl (finfish)	0.93	2.838	Cod	0.09	Bottom trawl (finfish)	0.93	2.838	Cod	0.1	Bottom trawl (finfish)	0.93	interpolated	Cod	0.1	Bottom trawl (finfish)	0.93	0.196	Cod	0.1	Bottom trawl (finfish)	0.93	0.196	Cod	0.1
				Redfish	0.3				Redfish	0.34				Redfish	0.38				Redfish	0.38				Redfish	0.37				Redfish	0.37				Redfish	0.1221				Redfish	0.1221
				Haddock	0.3				Haddock	0.34				Haddock	0.37				Haddock	0.37				Haddock	0.37				Haddock	0.37				Haddock	0.37				Haddock	0.37
				Greenland halibut	0.05				Greenland halibut	0.06				Greenland halibut	0.06				Greenland halibut	0.06				Greenland halibut	0.06				Greenland halibut	0.06				Greenland halibut	0.07				Greenland halibut	0.07
				Wolffishes	0.02				Wolffishes	0.03				Wolffishes	0.03				Wolffishes	0.03				Wolffishes	0.03				Wolffishes	0.03				Wolffishes	0.07				Wolffishes	0.07
				Pleuronectidae	0.03				Pleuronectidae	0.04				Pleuronectidae	0.04				Pleuronectidae	0.04				Pleuronectidae	0.04				Pleuronectidae	0.04				Pleuronectidae	0.1				Pleuronectidae	0.1
				Saithe	0.02				Saithe	0.03				Saithe	0.03				Saithe	0.03				Saithe	0.03				Saithe	0.03				Saithe	0.07				Saithe	0.07
				-	-				-	-				-	-				-	-				-	-				-	-				Gadiformes	0.1				Gadiformes	0.1
	Longline	0.07	0.784	Haddock	0.6	Longline	0.07	0.784	Haddock	0.6	Longline	0.07	0.784	Haddock	0.6	Longline	0.07	0.784	Haddock	0.6	Longline	0.07	0.075	Haddock	0.6	Longline	0.07	0.075	Haddock	0.6	Longline	0.07	0.075	Haddock	0.6	Longline	0.07	0.075	Haddock	0.6
				Wolffishes	0.18				Wolffishes	0.18				Wolffishes	0.18				Wolffishes	0.18				Wolffishes	0.18				Wolffishes	0.18				Wolffishes	0.18				Wolffishes	0.18
				Cod	0.04				Cod	0.04				Cod	0.04				Cod	0.04				Cod	0.04				Cod	0.04				Cod	0.04				Cod	0.04
				Greenland halibut	0.07				Greenland halibut	0.07				Greenland halibut	0.07				Greenland halibut	0.07				Greenland halibut	0.07				Greenland halibut	0.07				Greenland halibut	0.07				Greenland halibut	0.07
				Redfish	0.03				Redfish	0.03				Redfish	0.03				Redfish	0.03				Redfish	0.03				Redfish	0.03				Redfish	0.03				Redfish	0.03
				Gadiformes	0.05				Gadiformes	0.05				Gadiformes	0.05				Gadiformes	0.05				Gadiformes	0.05				Gadiformes	0.05				Gadiformes	0.05				Gadiformes	0.05
				Pleuronectidae	0.01				Pleuronectidae	0.01				Pleuronectidae	0.01				Pleuronectidae	0.01				Pleuronectidae	0.01				Pleuronectidae	0.01				Pleuronectidae	0.01				Pleuronectidae	0.01
				Raja	0.02				Raja	0.02				Raja	0.02				Raja	0.02				Raja	0.02				Raja	0.02				Raja	0.02				Raja	0.02
Saithe	Bottom trawl (finfish)	0.93	2.838	Cod	0.28	Bottom trawl (finfish)	0.93	2.838	Cod	0.16	Bottom trawl (finfish)	0.93	2.838	Cod	0.09	Bottom trawl (finfish)	0.93	2.838	Cod	0.09	Bottom trawl (finfish)	0.93	2.838	Cod	0.1	Bottom trawl (finfish)	0.93	interpolated	Cod	0.1	Bottom trawl (finfish)	0.93	0.196	Cod	0.1	Bottom trawl (finfish)	0.93	0.196	Cod	0.1
				Redfish	0.3				Redfish	0.34				Redfish	0.38				Redfish	0.38				Redfish	0.37				Redfish	0.37				Redfish	0.1221				Redfish	0.1221
				Haddock	0.3				Haddock	0.34				Haddock	0.37				Haddock	0.37				Haddock	0.37				Haddock	0.37				Haddock	0.37				Haddock	0.37
				Greenland halibut	0.05				Greenland halibut	0.06				Greenland halibut	0.06				Greenland halibut	0.06				Greenland halibut	0.06				Greenland halibut	0.06				Greenland halibut	0.07				Greenland halibut	0.07
				Wolffishes	0.02				Wolffishes	0.03				Wolffishes	0.03				Wolffishes	0.03				Wolffishes	0.03				Wolffishes	0.03				Wolffishes	0.07				Wolffishes	0.07
				Pleuronectidae	0.03				Pleuronectidae	0.04				Pleuronectidae	0.04				Pleuronectidae	0.04				Pleuronectidae	0.04				Pleuronectidae	0.04				Pleuronectidae	0.1				Pleuronectidae	0.1
				Saithe	0.02				Saithe	0.03				Saithe	0.03				Saithe	0.03				Saithe	0.03				Saithe	0.03				Saithe	0.07				Saithe	0.07
				-	-				-	-				-	-				-	-				-	-				-	-				Gadiformes	0.1				Gadiformes	0.1
	Longline	0.07	0.784	Haddock	0.6	Longline	0.07	0.784	Haddock	0.6	Longline	0.07	0.784	Haddock	0.6	Longline	0.07	0.784	Haddock	0.6	Longline	0.07	0.075	Haddock	0.6	Longline	0.07	0.075	Haddock	0.6	Longline	0.07	0.075	Haddock	0.6	Longline	0.07	0.075	Haddock	0.6
				Wolffishes	0.18				Wolffishes	0.18				Wolffishes	0.18				Wolffishes	0.18				Wolffishes	0.18				Wolffishes	0.18				Wolffishes	0.18				Wolffishes	0.18
				Cod	0.04				Cod	0.04				Cod	0.04				Cod	0.04				Cod	0.04				Cod	0.04				Cod	0.04				Cod	0.04
				Greenland halibut	0.07				Greenland halibut	0.07				Greenland halibut	0.07				Greenland halibut	0.07				Greenland halibut	0.07				Greenland halibut	0.07				Greenland halibut	0.07				Greenland halibut	0.07
				Redfish	0.03				Redfish	0.03				Redfish	0.03				Redfish	0.03				Redfish	0.03				Redfish	0.03				Redfish	0.03				Redfish	0.03
				Gadiformes	0.05				Gadiformes	0.05				Gadiformes	0.05				Gadiformes	0.05				Gadiformes	0.05				Gadiformes	0.05				Gadiformes	0.05				Gadiformes	0.05
				Pleuronectidae	0.01				Pleuronectidae	0.01				Pleuronectidae	0.01				Pleuronectidae	0.01				Pleuronectidae	0.01				Pleuronectidae	0.01				Pleuronectidae	0.01				Pleuronectidae	0.01
				Raja	0.02				Raja	0.02				Raja	0.02				Raja	0.02				Raja	0.02				Raja	0.02				Raja	0.02				Raja	0.02
Redfish	Bottom trawl (finfish)	0.93	2.838	Cod	0.28	Bottom trawl (finfish)	0.93	2.838	Cod	0.16	Bottom trawl (finfish)	0.93	2.838	Cod	0.09	Bottom trawl (finfish)	0.93	2.838	Cod	0.09	Bottom trawl (finfish)	0.93	2.838	Cod	0.1	Bottom trawl (finfish)	0.93	interpolated	Cod	0.1	Bottom trawl (finfish)	0.93	0.196	Cod	0.1	Bottom trawl (finfish)	0.93	0.196	Cod	0.1
				Redfish	0.3				Redfish	0.34				Redfish	0.38				Redfish	0.38				Redfish	0.37				Redfish	0.37				Redfish	0.1221				Redfish	0.1221
				Haddock	0.3				Haddock	0.34				Haddock	0.37				Haddock	0.37				Haddock	0.37				Haddock	0.37				Haddock	0.37				Haddock	0.37
				Greenland halibut	0.05				Greenland halibut	0.06				Greenland halibut	0.06				Greenland halibut	0.06				Greenland halibut	0.06				Greenland halibut	0.06				Greenland halibut	0.07				Greenland halibut	0.07
				Wolffishes	0.02				Wolffishes	0.03				Wolffishes	0.03				Wolffishes	0.03				Wolffishes	0.03				Wolffishes	0.03				Wolffishes	0.07				Wolffishes	0.07
				Pleuronectidae	0.03				Pleuronectidae	0.04				Pleuronectidae	0.04				Pleuronectidae	0.04				Pleuronectidae	0.04				Pleuronectidae	0.04				Pleuronectidae	0.1				Pleuronectidae	0.1
				Saithe	0.02				Saithe	0.03				Saithe	0.03				Saithe	0.03				Saithe	0.03				Saithe	0.03				Saithe	0.07				Saithe	0.07
				-	-				-	-				-	-				-	-				-	-				-	-				Gadiformes	0.1				Gadiformes	0.1
	Longline	0.07	0.784	Haddock	0.6	Longline	0.07	0.784	Haddock	0.6	Longline	0.07	0.784	Haddock	0.6	Longline	0.07	0.784	Haddock	0.6	Longline	0.07	0.075	Haddock	0.6	Longline	0.07	0.075	Haddock	0.6	Longline	0.07	0.075	Haddock	0.6	Longline	0.07	0.075	Haddock	0.6
				Wolffishes	0.18				Wolffishes	0.18				Wolffishes	0.18				Wolffishes	0.18				Wolffishes	0.18				Wolffishes	0.18				Wolffishes	0.18				Wolffishes	0.18
				Cod	0.04				Cod	0.04				Cod	0.04				Cod	0.04				Cod	0.04				Cod	0.04				Cod	0.04				Cod	0.04
				Greenland halibut	0.07				Greenland halibut	0.07				Greenland halibut	0.07				Greenland halibut	0.07				Greenland halibut	0.07				Greenland halibut	0.07				Greenland halibut	0.07				Greenland halibut	0.07
				Redfish	0.03				Redfish	0.03				Redfish	0.03				Redfish	0.03				Redfish	0.03				Redfish	0.03				Redfish	0.03				Redfish	0.03
				Gadiformes	0.05				Gadiformes	0.05				Gadiformes	0.05				Gadiformes	0.05				Gadiformes	0.05				Gadiformes	0.05				Gadiformes	0.05				Gadiformes	0.05
				Pleuronectidae	0.01				Pleuronectidae	0.01				Pleuronectidae	0.01				Pleuronectidae	0.01				Pleuronectidae	0.01				Pleuronectidae	0.01				Pleuronectidae	0.01				Pleuronectidae	0.01
				Raja	0.02				Raja	0.02				Raja	0.02				Raja	0.02				Raja	0.02				Raja	0.02				Raja	0.02				Raja	0.02
Prawn	Prawn trawl	1	1.44	Cod	0.28	Prawn trawl	1	1.44	Cod	0.16	Prawn trawl	1	1.44	Cod	0.09	Prawn trawl	1	1.44	Cod	0.09	Prawn trawl	1	0.72	Cod	0.1	Prawn trawl	1	0.054	Cod	0.1	Prawn trawl	1	0.054	Cod	0.1	Prawn trawl	1	0.054	Cod	0.1
				Redfish	0.3				Redfish	0.34				Redfish	0.38				Redfish	0.38				Redfish	0.37				Redfish	0				Redfish	0.1221				Redfish	0.1221
				Haddock	0.3				Haddock	0.34				Haddock	0.37				Haddock	0.37				Haddock	0.37				Haddock	0.38				Haddock	0.38				Haddock	0.38
				Greenland halibut	0.05				Greenland halibut	0.06				Greenland halibut	0.06				Greenland halibut	0.06				Greenland halibut	0.06				Greenland halibut	0.0571429				Greenland halibut	0.0571429				Greenland halibut	0.0571429
				Wolffishes	0.02				Wolffishes	0.03				Wolffishes	0.03				Wolffishes	0.03				Wolffishes	0.03				Wolffishes	0.0571429				Wolffishes	0.0571429				Wolffishes	0.0571429
				Pleuronectidae	0.03				Pleuronectidae	0.04				Pleuronectidae	0.04				Pleuronectidae	0.04				Pleuronectidae	0.04				European plaice	0.0571429				European plaice	0.0571429				European plaice	0.0571429
				Saithe	0.02				Saithe	0.03				Saithe	0.03				Saithe	0.03				Saithe	0.03				Long rough dab	0.0571429				Long rough dab	0.0571429				Long rough dab	0.0571429
				-	-				-	-				-	-				-	-				-	-				Lycodes gracilis	0.0571429				Lycodes gracilis	0.0571429				Lycodes gracilis	0.0571429
				-	-				-	-				-	-				-	-				-	-				Saithe	0.0571429				Saithe	0.0571429				Saithe	0.0571429
				-	-				-	-				-	-				-	-				-	-				Gadiformes	0.0571429				Gadiformes	0.0571429				Gadiformes	0.0571429
Wolffish	Longline	1	0.784	Haddock	0.6	Longline	1	0.784	Haddock	0.6	Longline	1	0.784	Haddock	0.6	Longline	1	0.784	Haddock	0.6	Longline	1	0.075	Haddock	0.6	Longline	1	0.075	Haddock	0.6	Longline	1	0.075	Haddock	0.6	Longline	1	0.075	Haddock	0.6
				Wolffishes	0.18				Wolffishes	0.18				Wolffishes	0.18				Wolffishes	0.18				Wolffishes	0.18				Wolffishes	0.18				Wolffishes	0.18				Wolffishes	0.18
				Cod	0.04				Cod	0.04				Cod	0.04				Cod	0.04				Cod	0.04				Cod	0.04				Cod	0.04				Cod	0.04
				Greenland halibut	0.07				Greenland halibut	0.07				Greenland halibut	0.07				Greenland halibut	0.07				Greenland halibut	0.07				Greenland halibut	0.07				Greenland halibut	0.07				Greenland halibut	0.07
				Redfish	0.03				Redfish	0.03				Redfish	0.03				Redfish	0.03				Redfish	0.03				Redfish	0.03				Redfish	0.03				Redfish	0.03
				Gadiformes	0.05				Gadiformes	0.05				Gadiformes	0.05				Gadiformes	0.05				Gadiformes	0.05				Gadiformes	0.05				Gadiformes	0.05				Gadiformes	0.05
				Pleuronectidae	0.01				Pleuronectidae	0.01				Pleuronectidae	0.01				Pleuronectidae	0.01				Pleuronectidae	0.01				Pleuronectidae	0.01				Pleuronectidae	0.01				Pleuronectidae	0.01
				Raja	0.02				Raja	0.02				Raja	0.02				Raja	0.02				Raja	0.02				Raja	0.02				Raja	0.02				Raja	0.02
Greenland halibut	Bottom trawl (flatfish)	0.9	2.838	Cod	0.28	Bottom trawl (flatfish)	0.9	2.838	Cod	0.16	Bottom trawl (flatfish)	0.9	2.838	Cod	0.09	Bottom trawl (flatfish)	0.9	2.838	Cod	0.09	Bottom trawl (flatfish)	0.9	2.838	Cod	0.1	Bottom trawl (flatfish)	0.9	interpolated	Cod	0.1	Bottom trawl (flatfish)	0.9	0.531	Cod	0.1	Bottom trawl (flatfish)	0.9	0.2655	Cod	0.1
				Redfish	0.3				Redfish	0.34				Redfish	0.38				Redfish	0.38				Redfish	0.37				Redfish	0.37				Redfish	0.37				Redfish	0.1221
				Haddock	0.3				Haddock	0.34				Haddock	0.37				Haddock	0.37				Haddock	0.37				Haddock	0.37				Haddock	0.37				Haddock	0.37
				Greenland halibut	0.05				Greenland halibut	0.06				Greenland halibut	0.06				Greenland halibut	0.06				Greenland halibut	0.06				Greenland halibut	0.06				Greenland halibut	0.06				Greenland halibut	0.07
				Wolffishes	0.02				Wolffishes	0.03				Wolffishes	0.03				Wolffishes	0.03				Wolffishes	0.03				Wolffishes	0.03				Wolffishes	0.03				Wolffishes	0.07
				Pleuronectidae	0.03				Pleuronectidae	0.04				Pleuronectidae	0.04				Pleuronectidae	0.04				Pleuronectidae	0.04				Pleuronectidae	0.04				Pleuronectidae	0.04				Pleuronectidae	0.1
				Saithe	0.02				Saithe	0.03				Saithe	0.03				Saithe	0.03				Saithe	0.03				Saithe	0.03				Saithe	0.03				Saithe	0.07
				-	-				-	-				-	-				-	-				-	-				-	-				-	-				Gadiformes	0.1
	Longline	0.1	0.784	Haddock	0.6	Longline	0.1	0.784	Haddock	0.6	Longline	0.1	0.784	Haddock	0.6	Longline	0.1	0.784	Haddock	0.6	Longline	0.1	0.075	Haddock	0.6	Longline	0.1	0.075	Haddock	0.6	Longline	0.1	0.075	Haddock	0.6	Longline	0.1	0.075	Haddock	0.6
				Wolffishes	0.18				Wolffishes	0.18				Wolffishes	0.18				Wolffishes	0.18				Wolffishes	0.18				Wolffishes	0.18				Wolffishes	0.18				Wolffishes	0.18
				Cod	0.04				Cod	0.04				Cod	0.04				Cod	0.04				Cod	0.04				Cod	0.04				Cod	0.04				Cod	0.04
				Greenland halibut	0.07				Greenland halibut	0.07				Greenland halibut	0.07				Greenland halibut	0.07				Greenland halibut	0.07				Greenland halibut	0.07				Greenland halibut	0.07				Greenland halibut	0.07
				Redfish	0.03				Redfish	0.03				Redfish	0.03				Redfish	0.03				Redfish	0.03				Redfish	0.03				Redfish	0.03				Redfish	0.03
				Gadiformes	0.05				Gadiformes	0.05				Gadiformes	0.05				Gadiformes	0.05				Gadiformes	0.05				Gadiformes	0.05				Gadiformes	0.05				Gadiformes	0.05
				Pleuronectidae	0.01				Pleuronectidae	0.01				Pleuronectidae	0.01				Pleuronectidae	0.01				Pleuronectidae	0.01				Pleuronectidae	0.01				Pleuronectidae	0.01				Pleuronectidae	0.01
				Raja	0.02				Raja	0.02				Raja	0.02				Raja	0.02				Raja	0.02				Raja	0.02				Raja	0.02				Raja	0.02
